# Supplementary material
Source: PubMed Central journal article supplement (PMC2932868)
Supplement: NIHMS218320-supplement-Supp_Data.pdf [file NIHMS218320-supplement-Supp_Data.pdf]

**Supp. Table S1. SNPs from 43 telomere biology gene regions**

| Gene         | SNP        | Alleles* | MAF   | Gene name; aka                                                        |
|--------------|------------|----------|-------|-----------------------------------------------------------------------|
| <i>ACD</i>   | rs12449157 | A:G      | 0.155 | Adrenocortical dysplasia homolog<br>(mouse); PTPN1, Pip1, TINT1, Tpp1 |
|              | rs6979     | A:G      | 0.482 |                                                                       |
|              | rs7187476  | T:C      | 0.157 |                                                                       |
|              | rs7202185  | G:A      | 0.071 |                                                                       |
|              | rs9972635  | T:C      | 0.051 |                                                                       |
| <i>ATM</i>   | rs1263886  | A:G      | 0.430 | Ataxia-Telangiectasia Mutated; TEL1                                   |
|              | rs1800058  | C:T      | 0.018 |                                                                       |
|              | rs1800889  | C:T      | 0.047 |                                                                       |
|              | rs1801516  | G:A      | 0.141 |                                                                       |
|              | rs227060   | C:T      | 0.330 |                                                                       |
|              | rs227064   | G:A      | 0.420 |                                                                       |
|              | rs4987876  | G:T      | 0.100 |                                                                       |
|              | rs609261   | G:A      | 0.430 |                                                                       |
| <i>BICD1</i> | rs623860   | T:C      | 0.420 | Bicaudal D homolog 1 (Drosophila)                                     |
|              | rs10771917 | T:G      | 0.184 |                                                                       |
|              | rs10771923 | T:C      | 0.397 |                                                                       |
|              | rs10771924 | A:C      | 0.222 |                                                                       |
|              | rs10771942 | G:A      | 0.453 |                                                                       |
|              | rs10844144 | A:C      | 0.133 |                                                                       |
|              | rs10844152 | T:C      | 0.156 |                                                                       |
|              | rs10844154 | C:A      | 0.443 |                                                                       |
|              | rs10844159 | A:G      | 0.130 |                                                                       |
|              | rs10844175 | C:T      | 0.113 |                                                                       |
|              | rs10844177 | C:A      | 0.113 |                                                                       |
|              | rs10844178 | G:A      | 0.300 |                                                                       |
|              | rs11051794 | T:G      | 0.193 |                                                                       |
|              | rs11051825 | T:C      | 0.321 |                                                                       |
|              | rs11051829 | G:T      | 0.142 |                                                                       |
|              | rs11051834 | G:T      | 0.304 |                                                                       |
|              | rs11051885 | A:G      | 0.044 |                                                                       |
|              | rs11051890 | C:T      | 0.067 |                                                                       |
|              | rs11051898 | G:A      | 0.165 |                                                                       |
|              | rs11051902 | G:A      | 0.116 |                                                                       |
|              | rs11051905 | G:A      | 0.116 |                                                                       |
|              | rs11051928 | C:A      | 0.222 |                                                                       |
|              | rs11051966 | G:A      | 0.119 |                                                                       |
|              | rs1144713  | G:A      | 0.409 |                                                                       |
|              | rs1144720  | T:C      | 0.322 |                                                                       |
|              | rs1151038  | G:T      | 0.390 |                                                                       |
|              | rs12229856 | C:T      | 0.307 |                                                                       |
|              | rs12296246 | A:G      | 0.062 |                                                                       |
|              | rs12297466 | A:C      | 0.132 |                                                                       |
|              | rs12312730 | G:A      | 0.258 |                                                                       |
|              | rs12369637 | T:C      | 0.022 |                                                                       |
|              | rs1239608  | G:T      | 0.211 |                                                                       |
|              | rs12426412 | A:G      | 0.135 |                                                                       |
| rs1261166    | G:A        | 0.193    |       |                                                                       |

**Supp. Table S1. SNPs from 43 telomere biology gene regions**

| Gene | SNP        | Alleles* | MAF   | Gene name; aka |
|------|------------|----------|-------|----------------|
|      | rs1271151  | G:A      | 0.188 |                |
|      | rs155202   | T:C      | 0.484 |                |
|      | rs1613650  | A:G      | 0.266 |                |
|      | rs161974   | G:A      | 0.374 |                |
|      | rs161981   | G:A      | 0.464 |                |
|      | rs1673857  | C:T      | 0.195 |                |
|      | rs16919488 | G:A      | 0.084 |                |
|      | rs16919514 | A:G      | 0.055 |                |
|      | rs16919663 | A:C      | 0.148 |                |
|      | rs17585107 | A:G      | 0.155 |                |
|      | rs17587240 | A:G      | 0.075 |                |
|      | rs1798255  | G:A      | 0.327 |                |
|      | rs1809241  | A:G      | 0.260 |                |
|      | rs2129590  | C:T      | 0.400 |                |
|      | rs2291420  | C:T      | 0.221 |                |
|      | rs2593993  | C:T      | 0.447 |                |
|      | rs2593996  | C:T      | 0.468 |                |
|      | rs2593998  | A:G      | 0.324 |                |
|      | rs2608396  | A:G      | 0.419 |                |
|      | rs261869   | C:T      | 0.403 |                |
|      | rs261871   | A:G      | 0.166 |                |
|      | rs261878   | C:T      | 0.450 |                |
|      | rs261884   | C:T      | 0.097 |                |
|      | rs261900   | C:A      | 0.353 |                |
|      | rs261902   | C:T      | 0.172 |                |
|      | rs2632359  | C:A      | 0.297 |                |
|      | rs2650143  | C:T      | 0.482 |                |
|      | rs2650144  | A:G      | 0.465 |                |
|      | rs2652007  | A:G      | 0.438 |                |
|      | rs2668301  | T:C      | 0.183 |                |
|      | rs2683471  | C:T      | 0.266 |                |
|      | rs325425   | A:C      | 0.487 |                |
|      | rs325426   | T:G      | 0.492 |                |
|      | rs325429   | A:G      | 0.404 |                |
|      | rs325435   | C:T      | 0.085 |                |
|      | rs325437   | T:C      | 0.495 |                |
|      | rs326633   | T:C      | 0.382 |                |
|      | rs326640   | C:T      | 0.408 |                |
|      | rs326644   | A:G      | 0.472 |                |
|      | rs3748276  | A:G      | 0.221 |                |
|      | rs3789975  | A:G      | 0.219 |                |
|      | rs3844105  | T:C      | 0.201 |                |
|      | rs3871520  | C:T      | 0.473 |                |
|      | rs4931619  | T:C      | 0.427 |                |
|      | rs6488035  | C:T      | 0.133 |                |
|      | rs6488043  | A:G      | 0.135 |                |
|      | rs708224   | G:A      | 0.418 |                |
|      | rs7136736  | A:G      | 0.062 |                |

**Supp. Table S1. SNPs from 43 telomere biology gene regions**

| Gene           | SNP        | Alleles* | MAF   | Gene name; aka                                                                                            |
|----------------|------------|----------|-------|-----------------------------------------------------------------------------------------------------------|
|                | rs7298381  | G:T      | 0.445 |                                                                                                           |
|                | rs7314141  | T:C      | 0.351 |                                                                                                           |
|                | rs7484762  | G:A      | 0.486 |                                                                                                           |
|                | rs7956602  | G:A      | 0.219 |                                                                                                           |
|                | rs7961369  | G:A      | 0.471 |                                                                                                           |
|                | rs7964583  | G:A      | 0.361 |                                                                                                           |
|                | rs7975071  | T:C      | 0.497 |                                                                                                           |
|                | rs901598   | G:A      | 0.303 |                                                                                                           |
|                | rs901600   | T:G      | 0.254 |                                                                                                           |
|                | rs9651846  | A:G      | 0.206 |                                                                                                           |
|                | rs985442   | G:A      | 0.117 |                                                                                                           |
|                | rs16944739 | C:T      | 0.269 |                                                                                                           |
|                | rs16944840 | A:C      | 0.032 |                                                                                                           |
|                | rs16944894 | A:G      | 0.186 |                                                                                                           |
|                | rs17183344 | C:T      | 0.191 |                                                                                                           |
|                | rs2238337  | C:T      | 0.375 |                                                                                                           |
|                | rs2270132  | T:G      | 0.408 |                                                                                                           |
|                | rs2532105  | C:T      | 0.153 |                                                                                                           |
|                | rs3784780  | C:T      | 0.175 |                                                                                                           |
|                | rs3815003  | A:G      | 0.290 |                                                                                                           |
| <i>BLM</i>     | rs389480   | C:T      | 0.438 | Bloom syndrome, RecQ helicase-like;<br>RECQ3                                                              |
|                | rs401549   | A:G      | 0.350 |                                                                                                           |
|                | rs414634   | G:T      | 0.301 |                                                                                                           |
|                | rs441399   | T:C      | 0.463 |                                                                                                           |
|                | rs4932363  | G:A      | 0.058 |                                                                                                           |
|                | rs7162960  | A:G      | 0.214 |                                                                                                           |
|                | rs7175811  | G:A      | 0.348 |                                                                                                           |
|                | rs7179346  | T:G      | 0.085 |                                                                                                           |
|                | rs8037430  | C:T      | 0.314 |                                                                                                           |
|                | rs8041787  | C:T      | 0.286 |                                                                                                           |
|                | rs10073340 | C:T      | 0.162 |                                                                                                           |
|                | rs31489    | C:A      | 0.404 |                                                                                                           |
| <i>CLPTMIL</i> | rs401681   | C:T      | 0.436 | Cisplatin resistance-related protein 9;<br>CLPTM1-like, CRR9                                              |
|                | rs402710   | C:T      | 0.329 |                                                                                                           |
|                | rs4975616  | A:G      | 0.416 |                                                                                                           |
|                | rs2890489  | A:G      | 0.389 |                                                                                                           |
|                | rs3755132  | T:G      | 0.151 |                                                                                                           |
| <i>DDX1</i>    | rs3770467  | G:A      | 0.153 | DEAD (Asp-Glu-Ala-Asp) box<br>polypeptide 1                                                               |
|                | rs6717251  | C:A      | 0.421 |                                                                                                           |
|                | rs6734024  | G:A      | 0.319 |                                                                                                           |
|                | rs7594193  | A:G      | 0.154 |                                                                                                           |
|                | rs10843881 | A:G      | 0.448 |                                                                                                           |
| <i>DDX11</i>   | rs244496   | A:G      | 0.065 | DEAD/H (Asp-Glu-Ala-Asp/His) box<br>polypeptide 11 (CHL1-like helicase<br>homolog, <i>S. cerevisiae</i> ) |
|                | rs4931434  | C:A      | 0.325 |                                                                                                           |
|                | rs731137   | T:C      | 0.005 |                                                                                                           |
| <i>MAD1L1</i>  | rs1002170  | C:T      | 0.210 | MAD1 mitotic arrest deficient-like 1<br>(yeast); TP53I9                                                   |
|                | rs10233560 | T:C      | 0.339 |                                                                                                           |

**Supp. Table S1. SNPs from 43 telomere biology gene regions**

| Gene | SNP        | Alleles* | MAF   | Gene name; aka |
|------|------------|----------|-------|----------------|
|      | rs10239050 | A:G      | 0.395 |                |
|      | rs10256077 | T:C      | 0.428 |                |
|      | rs10257990 | T:C      | 0.363 |                |
|      | rs10260968 | A:G      | 0.403 |                |
|      | rs10267593 | G:A      | 0.202 |                |
|      | rs10275045 | C:T      | 0.413 |                |
|      | rs10278591 | C:T      | 0.215 |                |
|      | rs10950503 | C:A      | 0.400 |                |
|      | rs10950536 | A:G      | 0.429 |                |
|      | rs11764590 | C:T      | 0.217 |                |
|      | rs11767177 | G:T      | 0.099 |                |
|      | rs11772205 | C:T      | 0.415 |                |
|      | rs12536239 | C:T      | 0.020 |                |
|      | rs12666575 | C:T      | 0.371 |                |
|      | rs12666773 | C:T      | 0.013 |                |
|      | rs12699476 | C:A      | 0.271 |                |
|      | rs12699477 | T:C      | 0.362 |                |
|      | rs13225346 | T:C      | 0.440 |                |
|      | rs1558461  | G:A      | 0.111 |                |
|      | rs1612548  | G:A      | 0.227 |                |
|      | rs1625464  | T:C      | 0.120 |                |
|      | rs1626670  | G:A      | 0.377 |                |
|      | rs1637750  | T:C      | 0.418 |                |
|      | rs1639909  | C:A      | 0.409 |                |
|      | rs17132242 | G:A      | 0.030 |                |
|      | rs17186327 | G:A      | 0.185 |                |
|      | rs17187301 | T:G      | 0.229 |                |
|      | rs17790613 | G:A      | 0.179 |                |
|      | rs3778969  | G:A      | 0.383 |                |
|      | rs3778973  | C:T      | 0.229 |                |
|      | rs3778990  | C:T      | 0.320 |                |
|      | rs3778991  | G:A      | 0.351 |                |
|      | rs3778994  | C:A      | 0.386 |                |
|      | rs3778995  | T:C      | 0.120 |                |
|      | rs3800879  | G:A      | 0.353 |                |
|      | rs3800895  | G:A      | 0.280 |                |
|      | rs3800913  | A:G      | 0.411 |                |
|      | rs3800933  | T:C      | 0.474 |                |
|      | rs3996329  | C:T      | 0.182 |                |
|      | rs4236279  | G:A      | 0.039 |                |
|      | rs4273749  | T:C      | 0.044 |                |
|      | rs4721321  | A:G      | 0.268 |                |
|      | rs4721428  | A:G      | 0.329 |                |
|      | rs4721505  | G:A      | 0.300 |                |
|      | rs4994763  | T:C      | 0.384 |                |
|      | rs6461108  | A:G      | 0.091 |                |

**Supp. Table S1. SNPs from 43 telomere biology gene regions**

| Gene          | SNP        | Alleles* | MAF   | Gene name; aka                                                       |
|---------------|------------|----------|-------|----------------------------------------------------------------------|
|               | rs6461168  | A:G      | 0.285 |                                                                      |
|               | rs6461188  | C:T      | 0.171 |                                                                      |
|               | rs6944660  | G:A      | 0.351 |                                                                      |
|               | rs6948971  | A:G      | 0.213 |                                                                      |
|               | rs6952727  | A:G      | 0.414 |                                                                      |
|               | rs6954521  | C:A      | 0.336 |                                                                      |
|               | rs6954673  | C:T      | 0.336 |                                                                      |
|               | rs6967879  | C:A      | 0.036 |                                                                      |
|               | rs6972752  | G:A      | 0.312 |                                                                      |
|               | rs6978048  | T:G      | 0.336 |                                                                      |
|               | rs7783715  | C:T      | 0.371 |                                                                      |
|               | rs7788921  | C:A      | 0.215 |                                                                      |
|               | rs7799006  | C:T      | 0.356 |                                                                      |
|               | rs7805774  | T:C      | 0.336 |                                                                      |
|               | rs883444   | A:G      | 0.054 |                                                                      |
| <i>MEN1</i>   | rs2957154  | A:G      | 0.252 | Multiple endocrine neoplasia I;menin                                 |
|               | rs524386   | T:C      | 0.089 |                                                                      |
|               | rs669976   | T:C      | 0.101 |                                                                      |
|               | rs670358   | G:A      | 0.105 |                                                                      |
| <i>MRE11A</i> | rs10765682 | T:C      | 0.098 | MRE11 meiotic recombination 11<br>homolog A ( <i>S. cerevisiae</i> ) |
|               | rs10831228 | G:A      | 0.111 |                                                                      |
|               | rs12270338 | C:A      | 0.216 |                                                                      |
|               | rs1270146  | T:C      | 0.443 |                                                                      |
|               | rs12788248 | A:G      | 0.013 |                                                                      |
|               | rs13447720 | A:G      | 0.227 |                                                                      |
|               | rs2155209  | T:C      | 0.340 |                                                                      |
|               | rs2508678  | C:T      | 0.364 |                                                                      |
|               | rs529126   | C:A      | 0.264 |                                                                      |
|               | rs535801   | C:T      | 0.305 |                                                                      |
|               | rs598599   | G:A      | 0.277 |                                                                      |
|               | rs601391   | C:T      | 0.341 |                                                                      |
| <i>MYC</i>    | rs10505505 | T:G      | 0.049 | v-myc myelocytomatosis viral<br>oncogene homolog (avian); MRTL       |
|               | rs12680047 | T:C      | 0.374 |                                                                      |
|               | rs4645943  | C:T      | 0.039 |                                                                      |
|               | rs4645956  | C:T      | 0.095 |                                                                      |
|               | rs4645959  | A:G      | 0.036 |                                                                      |
|               | rs7462301  | G:A      | 0.031 |                                                                      |
| <i>NBN</i>    | rs10464867 | C:T      | 0.019 | Nibrin; p95 protein of the<br>MRE11/RAD50 complex                    |
|               | rs10504885 | C:A      | 0.032 |                                                                      |
|               | rs1805801  | G:T      | 0.354 |                                                                      |
|               | rs1805812  | T:C      | 0.084 |                                                                      |
|               | rs1805855  | A:G      | 0.029 |                                                                      |
|               | rs2021881  | C:T      | 0.328 |                                                                      |
|               | rs2073635  | G:A      | 0.321 |                                                                      |
|               | rs2107465  | C:T      | 0.292 |                                                                      |
|               | rs2735385  | C:A      | 0.325 |                                                                      |

**Supp. Table S1. SNPs from 43 telomere biology gene regions**

| Gene         | SNP        | Alleles* | MAF   | Gene name; aka                                    |
|--------------|------------|----------|-------|---------------------------------------------------|
|              | rs6470522  | G:A      | 0.166 |                                                   |
|              | rs6985793  | T:C      | 0.308 |                                                   |
|              | rs7013140  | A:G      | 0.003 |                                                   |
|              | rs867185   | G:A      | 0.355 |                                                   |
| <i>NOLA1</i> | rs1002989  | T:C      | 0.082 | Nucleolar protein family A, member 1; NOLA1, GAR1 |
|              | rs4610335  | A:C      | 0.136 |                                                   |
|              | rs7675460  | C:A      | 0.375 |                                                   |
| <i>NOLA2</i> | rs13189047 | C:A      | 0.199 | Nucleolar protein family A, member 2; NOLA2, NHP  |
|              | rs4976741  | T:G      | 0.107 |                                                   |
|              | rs6873523  | T:C      | 0.249 |                                                   |
| <i>NOLA3</i> | rs10519924 | A:G      | 0.440 | Nucleolar protein family A, member 3; NOP10       |
|              | rs11631094 | G:T      | 0.299 |                                                   |
|              | rs12595504 | A:G      | 0.126 |                                                   |
|              | rs17236875 | T:C      | 0.111 |                                                   |
|              | rs2279683  | C:A      | 0.063 |                                                   |
|              | rs2279685  | G:A      | 0.079 |                                                   |
|              | rs2279686  | T:C      | 0.499 |                                                   |
|              | rs347797   | A:G      | 0.458 |                                                   |
|              | rs347896   | T:C      | 0.330 |                                                   |
|              | rs442873   | T:C      | 0.056 |                                                   |
|              | rs6495662  | A:G      | 0.168 |                                                   |
|              | rs7162607  | G:A      | 0.448 |                                                   |
|              | rs8031404  | C:A      | 0.126 |                                                   |
| <i>PARP1</i> | rs1136410  | T:C      | 0.159 | Poly(ADP-ribose) polymerase-1                     |
|              | rs12567614 | C:T      | 0.421 |                                                   |
|              | rs1805410  | A:G      | 0.156 |                                                   |
|              | rs1805411  | C:A      | 0.159 |                                                   |
|              | rs1858549  | C:T      | 0.336 |                                                   |
|              | rs2027440  | T:C      | 0.160 |                                                   |
|              | rs2249844  | A:G      | 0.331 |                                                   |
|              | rs2293464  | C:T      | 0.167 |                                                   |
|              | rs3219090  | G:A      | 0.328 |                                                   |
|              | rs3219110  | A:G      | 0.463 |                                                   |
|              | rs6426551  | G:A      | 0.253 |                                                   |
|              | rs747658   | A:G      | 0.167 |                                                   |
|              | rs907186   | C:T      | 0.251 |                                                   |
|              | rs9426513  | A:G      | 0.157 |                                                   |
| <i>PARP2</i> | rs1713419  | T:C      | 0.442 | Poly(ADP-ribose) polymerase-2; ADPRTL2            |
|              | rs1760921  | A:G      | 0.037 |                                                   |
|              | rs1889363  | C:T      | 0.358 |                                                   |
|              | rs2678681  | G:A      | 0.077 |                                                   |
|              | rs3093872  | C:T      | 0.052 |                                                   |
|              | rs3093921  | A:G      | 0.022 |                                                   |
|              | rs3093926  | G:A      | 0.069 |                                                   |
|              | rs3093927  | G:A      | 0.005 |                                                   |
|              | rs3093930  | C:T      | 0.324 |                                                   |
|              | rs3093933  | G:T      | 0.244 |                                                   |

**Supp. Table S1. SNPs from 43 telomere biology gene regions**

| Gene         | SNP        | Alleles* | MAF   | Gene name; aka                                                           |
|--------------|------------|----------|-------|--------------------------------------------------------------------------|
|              | rs3093942  | A:C      | 0.210 |                                                                          |
|              | rs7153417  | G:T      | 0.030 |                                                                          |
|              | rs8009242  | A:G      | 0.258 |                                                                          |
| <i>PIF1</i>  | rs2414858  | A:G      | 0.421 | PIF1 5'-to-3' DNA helicase homolog<br>( <i>S. cerevisiae</i> ); C15orf20 |
|              | rs3743046  | G:T      | 0.439 |                                                                          |
|              | rs4777602  | A:G      | 0.146 |                                                                          |
|              | rs8036568  | T:C      | 0.135 |                                                                          |
|              | rs10089153 | A:G      | 0.261 |                                                                          |
|              | rs11250077 | C:T      | 0.399 |                                                                          |
|              | rs11779336 | C:T      | 0.066 |                                                                          |
|              | rs11783803 | G:T      | 0.075 |                                                                          |
|              | rs11998382 | A:G      | 0.223 |                                                                          |
|              | rs12681375 | A:G      | 0.041 |                                                                          |
|              | rs13270324 | G:A      | 0.031 |                                                                          |
|              | rs13270447 | G:T      | 0.054 |                                                                          |
|              | rs1469557  | C:T      | 0.206 |                                                                          |
|              | rs17152302 | T:C      | 0.240 |                                                                          |
|              | rs17152584 | G:A      | 0.132 |                                                                          |
|              | rs17774023 | T:C      | 0.299 |                                                                          |
|              | rs2292369  | A:G      | 0.407 |                                                                          |
|              | rs2409655  | T:C      | 0.281 |                                                                          |
|              | rs4840517  | A:G      | 0.319 |                                                                          |
| <i>PINXI</i> | rs6601521  | C:T      | 0.443 | PIN2-interacting protein 1                                               |
|              | rs6601522  | T:G      | 0.393 |                                                                          |
|              | rs6601525  | G:A      | 0.471 |                                                                          |
|              | rs6601534  | G:A      | 0.441 |                                                                          |
|              | rs6984094  | T:C      | 0.131 |                                                                          |
|              | rs6989370  | C:T      | 0.458 |                                                                          |
|              | rs6989930  | A:G      | 0.058 |                                                                          |
|              | rs6990041  | A:C      | 0.058 |                                                                          |
|              | rs6992312  | T:G      | 0.059 |                                                                          |
|              | rs6992366  | T:C      | 0.330 |                                                                          |
|              | rs6993841  | A:G      | 0.398 |                                                                          |
|              | rs718742   | A:C      | 0.285 |                                                                          |
|              | rs752446   | G:A      | 0.379 |                                                                          |
|              | rs7826189  | G:A      | 0.462 |                                                                          |
|              | rs7840785  | C:T      | 0.277 |                                                                          |
|              | rs891560   | T:C      | 0.128 |                                                                          |
|              | rs9657541  | C:T      | 0.207 |                                                                          |
| <i>POT1</i>  | rs10228682 | T:C      | 0.402 | Protection of telomeres 1                                                |
|              | rs10250911 | G:A      | 0.403 |                                                                          |
|              | rs10271646 | T:C      | 0.291 |                                                                          |
|              | rs10272583 | C:T      | 0.402 |                                                                          |
|              | rs11767519 | C:T      | 0.303 |                                                                          |
|              | rs11770818 | C:T      | 0.304 |                                                                          |
|              | rs12538333 | C:T      | 0.407 |                                                                          |
|              | rs12666427 | A:G      | 0.403 |                                                                          |

**Supp. Table S1. SNPs from 43 telomere biology gene regions**

| Gene            | SNP        | Alleles* | MAF   | Gene name; aka                                                 |
|-----------------|------------|----------|-------|----------------------------------------------------------------|
|                 | rs12706625 | A:C      | 0.304 |                                                                |
|                 | rs1904975  | A:G      | 0.403 |                                                                |
|                 | rs4283967  | C:T      | 0.400 |                                                                |
|                 | rs4377885  | T:C      | 0.403 |                                                                |
|                 | rs4463363  | G:A      | 0.403 |                                                                |
|                 | rs6466955  | C:T      | 0.397 |                                                                |
|                 | rs6961292  | G:A      | 0.401 |                                                                |
|                 | rs6973812  | C:T      | 0.403 |                                                                |
|                 | rs727505   | C:T      | 0.284 |                                                                |
|                 | rs7784168  | T:C      | 0.301 |                                                                |
|                 | rs7787804  | G:A      | 0.301 |                                                                |
|                 | rs7794637  | C:T      | 0.301 |                                                                |
|                 | rs7801661  | T:C      | 0.284 |                                                                |
|                 | rs10106778 | T:C      | 0.050 |                                                                |
|                 | rs10109984 | T:C      | 0.398 |                                                                |
|                 | rs1894311  | A:G      | 0.051 |                                                                |
|                 | rs2213178  | C:T      | 0.284 |                                                                |
|                 | rs4521758  | G:A      | 0.110 |                                                                |
|                 | rs4873772  | G:A      | 0.330 |                                                                |
| <i>PRKDC</i>    | rs7003908  | A:C      | 0.352 | Protein kinase, DNA-activated,<br>catalytic polypeptide; XRCC7 |
|                 | rs7830743  | A:G      | 0.048 |                                                                |
|                 | rs8178016  | G:A      | 0.047 |                                                                |
|                 | rs8178068  | G:A      | 0.078 |                                                                |
|                 | rs8178071  | G:A      | 0.160 |                                                                |
|                 | rs8178108  | A:G      | 0.054 |                                                                |
|                 | rs8178179  | A:C      | 0.058 |                                                                |
|                 | rs17772565 | C:T      | 0.049 |                                                                |
|                 | rs17772583 | A:G      | 0.245 |                                                                |
|                 | rs2069812  | C:T      | 0.301 |                                                                |
|                 | rs2237060  | A:C      | 0.418 |                                                                |
| <i>RAD50</i>    | rs2240032  | C:T      | 0.211 | RAD50 homolog ( <i>S. cerevisiae</i> )                         |
|                 | rs2244012  | T:C      | 0.216 |                                                                |
|                 | rs2897443  | C:A      | 0.207 |                                                                |
|                 | rs6871536  | T:C      | 0.215 |                                                                |
|                 | rs6884762  | C:T      | 0.028 |                                                                |
|                 | rs739719   | G:T      | 0.070 |                                                                |
|                 | rs10444471 | G:T      | 0.029 |                                                                |
|                 | rs10849083 | G:T      | 0.115 |                                                                |
|                 | rs10849087 | C:T      | 0.219 |                                                                |
|                 | rs2884670  | G:A      | 0.328 |                                                                |
| <i>RAD51AP1</i> | rs7298545  | T:C      | 0.283 | RAD51 associated protein 1                                     |
|                 | rs7299185  | T:G      | 0.262 |                                                                |
|                 | rs7302664  | C:T      | 0.104 |                                                                |
|                 | rs740059   | C:T      | 0.451 |                                                                |
|                 | rs7965755  | G:T      | 0.218 |                                                                |
|                 | rs7973740  | A:G      | 0.101 |                                                                |
| <i>RAD51C</i>   | rs12946522 | T:G      | 0.190 | RAD51 homolog C ( <i>S. cerevisiae</i> )                       |



**Supp. Table S1. SNPs from 43 telomere biology gene regions**

| Gene           | SNP        | Alleles* | MAF   | Gene name; aka                        |
|----------------|------------|----------|-------|---------------------------------------|
|                | rs304270   | A:G      | 0.370 |                                       |
|                | rs304271   | G:A      | 0.340 |                                       |
|                | rs304272   | G:T      | 0.339 |                                       |
|                | rs304283   | C:T      | 0.340 |                                       |
|                | rs9916423  | T:C      | 0.062 |                                       |
| <i>RAD51L1</i> | rs10131303 | G:A      | 0.061 | RAD51-like 1 ( <i>S. cerevisiae</i> ) |
|                | rs10132022 | A:G      | 0.202 |                                       |
|                | rs10132294 | T:C      | 0.199 |                                       |
|                | rs10133354 | T:C      | 0.217 |                                       |
|                | rs10134446 | A:G      | 0.442 |                                       |
|                | rs10136316 | C:T      | 0.401 |                                       |
|                | rs10146321 | A:G      | 0.163 |                                       |
|                | rs10146772 | C:A      | 0.426 |                                       |
|                | rs1023529  | T:C      | 0.350 |                                       |
|                | rs1033686  | C:T      | 0.160 |                                       |
|                | rs10483807 | G:A      | 0.370 |                                       |
|                | rs10483810 | G:T      | 0.090 |                                       |
|                | rs10483814 | G:A      | 0.095 |                                       |
|                | rs11158743 | C:T      | 0.140 |                                       |
|                | rs11158750 | T:C      | 0.226 |                                       |
|                | rs11158751 | A:G      | 0.489 |                                       |
|                | rs11621276 | A:G      | 0.263 |                                       |
|                | rs11623543 | T:C      | 0.392 |                                       |
|                | rs11626594 | C:A      | 0.404 |                                       |
|                | rs11626809 | G:T      | 0.138 |                                       |
|                | rs11628653 | T:G      | 0.418 |                                       |
|                | rs11849344 | G:A      | 0.200 |                                       |
|                | rs12100794 | T:G      | 0.041 |                                       |
|                | rs12587397 | G:A      | 0.152 |                                       |
|                | rs12589872 | G:A      | 0.185 |                                       |
|                | rs12878344 | G:A      | 0.303 |                                       |
|                | rs12886429 | A:G      | 0.152 |                                       |
|                | rs12889770 | G:A      | 0.159 |                                       |
|                | rs1290999  | G:A      | 0.206 |                                       |
|                | rs1314911  | T:C      | 0.154 |                                       |
|                | rs1314915  | T:C      | 0.170 |                                       |
|                | rs1314917  | A:C      | 0.066 |                                       |
|                | rs1541390  | A:G      | 0.205 |                                       |
|                | rs1570107  | T:C      | 0.061 |                                       |
|                | rs17104823 | A:G      | 0.011 |                                       |
|                | rs17104908 | G:A      | 0.182 |                                       |
|                | rs17105585 | C:T      | 0.364 |                                       |
|                | rs17105812 | T:C      | 0.202 |                                       |
|                | rs17105826 | G:A      | 0.103 |                                       |
|                | rs17105837 | G:A      | 0.224 |                                       |
|                | rs17105965 | T:C      | 0.147 |                                       |
|                | rs17192586 | G:A      | 0.182 |                                       |
|                | rs1744947  | C:T      | 0.169 |                                       |

**Supp. Table S1. SNPs from 43 telomere biology gene regions**

| Gene | SNP        | Alleles* | MAF   | Gene name; aka |
|------|------------|----------|-------|----------------|
|      | rs1744949  | C:T      | 0.170 |                |
|      | rs17755115 | G:A      | 0.079 |                |
|      | rs17755657 | T:G      | 0.263 |                |
|      | rs17756404 | A:G      | 0.309 |                |
|      | rs17783214 | C:T      | 0.116 |                |
|      | rs17829192 | T:C      | 0.109 |                |
|      | rs181565   | G:A      | 0.360 |                |
|      | rs181575   | T:C      | 0.374 |                |
|      | rs1950764  | C:T      | 0.176 |                |
|      | rs1950769  | G:T      | 0.392 |                |
|      | rs1956529  | A:G      | 0.372 |                |
|      | rs1956533  | G:A      | 0.456 |                |
|      | rs1956534  | T:C      | 0.363 |                |
|      | rs1957572  | T:C      | 0.080 |                |
|      | rs1958112  | T:C      | 0.182 |                |
|      | rs2064827  | T:G      | 0.217 |                |
|      | rs2074562  | G:A      | 0.333 |                |
|      | rs2074565  | T:G      | 0.375 |                |
|      | rs2145157  | T:C      | 0.387 |                |
|      | rs2158358  | T:C      | 0.272 |                |
|      | rs2189517  | G:A      | 0.440 |                |
|      | rs2208397  | C:A      | 0.291 |                |
|      | rs2236184  | G:A      | 0.309 |                |
|      | rs2236185  | T:C      | 0.479 |                |
|      | rs2244814  | A:G      | 0.311 |                |
|      | rs2253168  | C:T      | 0.405 |                |
|      | rs2256224  | A:G      | 0.266 |                |
|      | rs2256608  | G:A      | 0.201 |                |
|      | rs2285883  | G:A      | 0.205 |                |
|      | rs2331648  | G:A      | 0.152 |                |
|      | rs2331704  | A:G      | 0.196 |                |
|      | rs2525503  | G:A      | 0.476 |                |
|      | rs2525504  | A:G      | 0.244 |                |
|      | rs2588807  | G:A      | 0.173 |                |
|      | rs2588814  | T:C      | 0.167 |                |
|      | rs2588815  | C:T      | 0.170 |                |
|      | rs2588821  | T:C      | 0.180 |                |
|      | rs2588832  | A:C      | 0.194 |                |
|      | rs2588833  | G:T      | 0.181 |                |
|      | rs2753404  | A:C      | 0.322 |                |
|      | rs2842320  | T:C      | 0.195 |                |
|      | rs2842329  | A:C      | 0.270 |                |
|      | rs2842331  | A:C      | 0.232 |                |
|      | rs2842337  | G:A      | 0.005 |                |
|      | rs2877461  | C:A      | 0.482 |                |
|      | rs372143   | A:G      | 0.181 |                |
|      | rs3784108  | C:T      | 0.373 |                |
|      | rs3784111  | T:G      | 0.078 |                |

**Supp. Table S1. SNPs from 43 telomere biology gene regions**

| Gene | SNP       | Alleles* | MAF   | Gene name; aka |
|------|-----------|----------|-------|----------------|
|      | rs3784115 | G:A      | 0.482 |                |
|      | rs3784116 | T:C      | 0.263 |                |
|      | rs3784121 | C:T      | 0.235 |                |
|      | rs3784122 | T:C      | 0.126 |                |
|      | rs3784131 | T:G      | 0.132 |                |
|      | rs4262880 | G:A      | 0.102 |                |
|      | rs431649  | A:G      | 0.182 |                |
|      | rs4362328 | C:T      | 0.454 |                |
|      | rs4899243 | G:A      | 0.176 |                |
|      | rs4899244 | C:T      | 0.498 |                |
|      | rs4899246 | A:G      | 0.228 |                |
|      | rs4902538 | C:T      | 0.193 |                |
|      | rs4902562 | G:A      | 0.425 |                |
|      | rs4902571 | C:T      | 0.190 |                |
|      | rs4902586 | C:A      | 0.480 |                |
|      | rs5028394 | C:T      | 0.338 |                |
|      | rs6573834 | C:T      | 0.197 |                |
|      | rs6573841 | C:T      | 0.198 |                |
|      | rs7141945 | G:T      | 0.048 |                |
|      | rs7149396 | G:A      | 0.283 |                |
|      | rs7150454 | A:G      | 0.197 |                |
|      | rs7150860 | C:T      | 0.011 |                |
|      | rs7151587 | A:G      | 0.008 |                |
|      | rs7152152 | T:C      | 0.257 |                |
|      | rs727392  | T:C      | 0.076 |                |
|      | rs729138  | G:A      | 0.091 |                |
|      | rs7359088 | A:G      | 0.308 |                |
|      | rs737387  | G:A      | 0.469 |                |
|      | rs757369  | G:A      | 0.469 |                |
|      | rs761944  | A:C      | 0.179 |                |
|      | rs765899  | C:T      | 0.399 |                |
|      | rs8006141 | G:A      | 0.153 |                |
|      | rs8008333 | A:G      | 0.233 |                |
|      | rs8009813 | C:T      | 0.101 |                |
|      | rs8009876 | C:T      | 0.163 |                |
|      | rs8009944 | A:C      | 0.280 |                |
|      | rs8012659 | C:T      | 0.070 |                |
|      | rs8014025 | G:A      | 0.492 |                |
|      | rs8019592 | C:T      | 0.296 |                |
|      | rs8020795 | G:A      | 0.191 |                |
|      | rs911263  | A:G      | 0.296 |                |
|      | rs916962  | G:A      | 0.235 |                |
|      | rs927220  | A:C      | 0.278 |                |
|      | rs927221  | T:C      | 0.154 |                |
|      | rs9323505 | T:C      | 0.094 |                |
|      | rs9323508 | G:A      | 0.478 |                |
|      | rs932554  | A:G      | 0.216 |                |
|      | rs963917  | C:T      | 0.310 |                |

**Supp. Table S1. SNPs from 43 telomere biology gene regions**

| Gene           | SNP        | Alleles* | MAF   | Gene name; aka                                   |
|----------------|------------|----------|-------|--------------------------------------------------|
|                | rs963918   | A:G      | 0.367 |                                                  |
|                | rs9989153  | A:G      | 0.092 |                                                  |
|                | rs999737   | C:T      | 0.226 |                                                  |
|                | rs17629188 | G:A      | 0.151 |                                                  |
|                | rs1871892  | C:T      | 0.322 |                                                  |
|                | rs3736143  | C:T      | 0.471 |                                                  |
| <i>RAD51L3</i> | rs3816754  | G:T      | 0.052 | RAD51-like 3 ( <i>S. cerevisiae</i> )            |
|                | rs4796033  | C:T      | 0.141 |                                                  |
|                | rs8075760  | C:T      | 0.459 |                                                  |
|                | rs8077720  | G:A      | 0.321 |                                                  |
|                | rs936656   | A:G      | 0.483 |                                                  |
|                | rs11211262 | C:T      | 0.374 |                                                  |
|                | rs12141269 | C:T      | 0.147 |                                                  |
|                | rs12142240 | T:C      | 0.297 |                                                  |
|                | rs12410307 | G:A      | 0.101 |                                                  |
| <i>RAD54L</i>  | rs17102086 | T:C      | 0.180 | RAD54-like ( <i>S. cerevisiae</i> ): RAD54A      |
|                | rs17102087 | C:T      | 0.111 |                                                  |
|                | rs4660918  | T:C      | 0.236 |                                                  |
|                | rs6692775  | G:T      | 0.233 |                                                  |
|                | rs9793263  | G:A      | 0.407 |                                                  |
| <i>RECQL</i>   | rs1029931  | T:C      | 0.266 | RecQ protein-like (DNA helicase Q1-like); RECQL1 |
|                | rs10492116 | C:T      | 0.051 |                                                  |
|                | rs10492117 | A:G      | 0.473 |                                                  |
|                | rs1061627  | T:C      | 0.211 |                                                  |
|                | rs10841830 | A:G      | 0.047 |                                                  |
|                | rs10841832 | G:A      | 0.486 |                                                  |
|                | rs10841839 | A:G      | 0.244 |                                                  |
|                | rs11046084 | T:C      | 0.280 |                                                  |
|                | rs11046094 | C:A      | 0.167 |                                                  |
|                | rs12312710 | G:A      | 0.224 |                                                  |
|                | rs12424924 | G:A      | 0.233 |                                                  |
|                | rs12582514 | C:T      | 0.483 |                                                  |
|                | rs17684048 | C:T      | 0.043 |                                                  |
|                | rs2159944  | T:C      | 0.266 |                                                  |
|                | rs2192170  | C:T      | 0.081 |                                                  |
|                | rs2284392  | G:A      | 0.422 |                                                  |
|                | rs2284394  | A:G      | 0.310 |                                                  |
|                | rs2300211  | C:A      | 0.458 |                                                  |
|                | rs3213213  | T:C      | 0.161 |                                                  |
|                | rs3752648  | T:C      | 0.486 |                                                  |
|                | rs3782660  | T:C      | 0.493 |                                                  |
|                | rs4762834  | C:T      | 0.262 |                                                  |
|                | rs4762836  | C:T      | 0.070 |                                                  |
|                | rs6487233  | T:C      | 0.445 |                                                  |
|                | rs7307064  | A:C      | 0.135 |                                                  |
|                | rs7976409  | G:A      | 0.135 |                                                  |

**Supp. Table S1. SNPs from 43 telomere biology gene regions**

| Gene          | SNP        | Alleles* | MAF   | Gene name; aka                                                    |
|---------------|------------|----------|-------|-------------------------------------------------------------------|
|               | rs997820   | A:C      | 0.401 |                                                                   |
| <i>RECQL4</i> | rs1063739  | C:A      | 0.478 | RecQ protein-like 4                                               |
|               | rs3757966  | C:T      | 0.476 |                                                                   |
| <i>RECQL5</i> | rs1093992  | G:A      | 0.325 | RecQ protein-like 5                                               |
|               | rs820152   | T:C      | 0.377 |                                                                   |
|               | rs820196   | T:C      | 0.221 |                                                                   |
|               | rs820206   | G:A      | 0.338 |                                                                   |
| <i>RTEL1</i>  | rs1291211  | G:A      | 0.076 | Regulator of Telomere elongation<br>helicase 1                    |
|               | rs2297437  | G:A      | 0.191 |                                                                   |
|               | rs2297440  | C:T      | 0.228 |                                                                   |
|               | rs4809324  | T:C      | 0.107 |                                                                   |
|               | rs6010620  | G:A      | 0.231 |                                                                   |
|               | rs6011002  | A:G      | 0.083 |                                                                   |
|               | rs879471   | T:C      | 0.435 |                                                                   |
|               | rs914561   | C:T      | 0.019 |                                                                   |
| <i>SIP1</i>   | rs12587208 | G:A      | 0.114 | Survival of motor neuron protein<br>interacting protein 1; GEMIN2 |
|               | rs6571897  | A:G      | 0.134 |                                                                   |
|               | rs9322993  | C:T      | 0.065 |                                                                   |
| <i>TEP1</i>   | rs1713419  | T:C      | 0.442 | Telomerase protein component 1                                    |
|               | rs1713423  | C:T      | 0.477 |                                                                   |
|               | rs1713434  | T:C      | 0.448 |                                                                   |
|               | rs1713456  | C:T      | 0.190 |                                                                   |
|               | rs1760889  | C:A      | 0.118 |                                                                   |
|               | rs1760893  | T:G      | 0.118 |                                                                   |
|               | rs1760897  | T:C      | 0.315 |                                                                   |
|               | rs1760898  | C:A      | 0.223 |                                                                   |
|               | rs1760904  | T:C      | 0.473 |                                                                   |
|               | rs1760907  | A:G      | 0.223 |                                                                   |
|               | rs1760909  | G:A      | 0.212 |                                                                   |
|               | rs2104977  | C:T      | 0.157 |                                                                   |
|               | rs2184282  | A:G      | 0.121 |                                                                   |
|               | rs2275009  | C:T      | 0.101 |                                                                   |
|               | rs2678681  | G:A      | 0.077 |                                                                   |
|               | rs2945461  | A:G      | 0.067 |                                                                   |
|               | rs3093942  | A:C      | 0.210 |                                                                   |
|               | rs3762146  | A:G      | 0.197 |                                                                   |
|               | rs4982038  | G:A      | 0.361 |                                                                   |
|               | rs872072   | G:A      | 0.441 |                                                                   |
| rs945012      | G:A        | 0.449    |       |                                                                   |
| <i>TERC</i>   | rs10936599 | C:T      | 0.247 | Telomerase RNA component                                          |
| <i>TERF1</i>  | rs10088657 | G:A      | 0.166 | Telomeric repeat binding factor<br>(NIMA-interacting) 1; TRF1     |
|               | rs10095169 | T:C      | 0.321 |                                                                   |
|               | rs10099824 | G:A      | 0.447 |                                                                   |
|               | rs11993041 | C:T      | 0.450 |                                                                   |
|               | rs17209700 | G:A      | 0.125 |                                                                   |
|               | rs2010441  | G:A      | 0.284 |                                                                   |
|               | rs2929580  | G:A      | 0.309 |                                                                   |

**Supp. Table S1. SNPs from 43 telomere biology gene regions**

| Gene                                   | SNP        | Alleles* | MAF   | Gene name; aka                                                   |
|----------------------------------------|------------|----------|-------|------------------------------------------------------------------|
|                                        | rs2975842  | G:A      | 0.435 |                                                                  |
|                                        | rs3102095  | T:G      | 0.304 |                                                                  |
|                                        | rs3863242  | G:A      | 0.446 |                                                                  |
|                                        | rs6472716  | A:G      | 0.462 |                                                                  |
|                                        | rs6472718  | C:T      | 0.147 |                                                                  |
|                                        | rs6982126  | C:T      | 0.251 |                                                                  |
|                                        | rs6994351  | A:G      | 0.384 |                                                                  |
|                                        | rs16958777 | C:T      | 0.062 |                                                                  |
|                                        | rs251796   | A:G      | 0.295 |                                                                  |
| <i>TERF2</i>                           | rs3785073  | G:A      | 0.274 | Telomeric repeat binding factor 2                                |
|                                        | rs3785074  | A:G      | 0.275 |                                                                  |
|                                        | rs7187579  | C:T      | 0.180 |                                                                  |
|                                        | rs7191614  | A:G      | 0.279 |                                                                  |
|                                        | rs3784929  | T:C      | 0.116 |                                                                  |
| <i>TERF2IP</i>                         | rs4888444  | A:G      | 0.043 | Telomeric repeat binding factor 2,<br>interacting protein; hRAP1 |
|                                        | rs7195089  | A:G      | 0.045 |                                                                  |
|                                        | rs8053257  | G:A      | 0.063 |                                                                  |
|                                        | rs2736100  | G:T      | 0.493 |                                                                  |
|                                        | rs2736122  | C:T      | 0.257 |                                                                  |
|                                        | rs2853668  | C:A      | 0.254 |                                                                  |
| <i>TERT</i>                            | rs2853676  | G:A      | 0.264 | Telomerase                                                       |
|                                        | rs4073918  | A:G      | 0.240 |                                                                  |
|                                        | rs4075202  | C:A      | 0.064 |                                                                  |
|                                        | rs4635969  | C:T      | 0.203 |                                                                  |
|                                        | rs4975605  | C:A      | 0.469 |                                                                  |
| <i>TERT</i><br>Additional <sup>†</sup> | rs10060236 | G:A      | 0.227 |                                                                  |
|                                        | rs10060827 | G:T      | 0.307 |                                                                  |
|                                        | rs11747247 | G:T      | 0.107 |                                                                  |
|                                        | rs12516758 | T:C      | 0.205 |                                                                  |
|                                        | rs13159461 | G:A      | 0.445 |                                                                  |
|                                        | rs16877324 | T:C      | 0.004 |                                                                  |
|                                        | rs1973489  | C:T      | 0.253 |                                                                  |
|                                        | rs246994   | C:T      | 0.277 |                                                                  |
|                                        | rs27061    | G:A      | 0.422 |                                                                  |
|                                        | rs27074    | G:A      | 0.086 |                                                                  |
|                                        | rs2963259  | C:T      | 0.195 |                                                                  |
|                                        | rs2963265  | G:A      | 0.442 |                                                                  |
|                                        | rs3922757  | T:C      | 0.196 |                                                                  |
|                                        | rs4246736  | C:T      | 0.379 |                                                                  |
|                                        | rs4326188  | G:A      | 0.217 |                                                                  |
|                                        | rs4640842  | C:T      | 0.120 |                                                                  |
|                                        | rs4975536  | T:C      | 0.303 |                                                                  |
|                                        | rs4975542  | G:A      | 0.061 |                                                                  |
|                                        | rs4975596  | A:G      | 0.281 |                                                                  |
|                                        | rs4975603  | C:A      | 0.114 |                                                                  |
|                                        | rs4975625  | C:T      | 0.420 |                                                                  |

**Supp. Table S1. SNPs from 43 telomere biology gene regions**

| Gene         | SNP        | Alleles* | MAF   | Gene name; aka                                                                   |
|--------------|------------|----------|-------|----------------------------------------------------------------------------------|
|              | rs4975636  | C:T      | 0.088 |                                                                                  |
|              | rs6554660  | G:A      | 0.354 |                                                                                  |
|              | rs6554667  | A:G      | 0.045 |                                                                                  |
|              | rs7445640  | T:G      | 0.389 |                                                                                  |
|              | rs7702150  | G:A      | 0.196 |                                                                                  |
|              | rs7719363  | A:G      | 0.157 |                                                                                  |
|              | rs7726442  | T:C      | 0.343 |                                                                                  |
|              | rs7727745  | C:A      | 0.150 |                                                                                  |
|              | rs2748516  | C:T      | 0.055 |                                                                                  |
| <i>TINF2</i> | rs2748531  | C:T      | 0.140 | TERF1 (TRF1)-interacting nuclear factor 2; TIN2                                  |
|              | rs2855006  | C:A      | 0.197 |                                                                                  |
|              | rs3814815  | C:A      | 0.053 |                                                                                  |
|              | rs7158744  | T:C      | 0.347 |                                                                                  |
|              | rs10093972 | T:C      | 0.073 |                                                                                  |
|              | rs10101132 | C:A      | 0.298 |                                                                                  |
|              | rs10111980 | C:T      | 0.235 |                                                                                  |
|              | rs10903314 | C:T      | 0.247 |                                                                                  |
|              | rs11249943 | A:C      | 0.192 |                                                                                  |
|              | rs11984920 | C:T      | 0.067 |                                                                                  |
|              | rs11991621 | C:T      | 0.177 |                                                                                  |
|              | rs11994018 | T:C      | 0.120 |                                                                                  |
|              | rs12155819 | G:A      | 0.366 |                                                                                  |
|              | rs12545912 | T:G      | 0.247 |                                                                                  |
|              | rs12549064 | A:C      | 0.177 |                                                                                  |
|              | rs12679892 | A:G      | 0.297 |                                                                                  |
|              | rs13273033 | A:G      | 0.243 |                                                                                  |
|              | rs17150237 | C:T      | 0.231 |                                                                                  |
|              | rs17150478 | A:G      | 0.188 |                                                                                  |
| <i>TNKS</i>  | rs4319098  | A:G      | 0.074 | Tankyrase, TRF1-interacting ankyrin-related ADP-ribose polymerase; TANK1, PARP5A |
|              | rs4840437  | A:G      | 0.372 |                                                                                  |
|              | rs4841171  | A:G      | 0.112 |                                                                                  |
|              | rs4841215  | C:T      | 0.064 |                                                                                  |
|              | rs6601327  | A:G      | 0.382 |                                                                                  |
|              | rs6601328  | A:G      | 0.112 |                                                                                  |
|              | rs6601333  | A:G      | 0.236 |                                                                                  |
|              | rs6984737  | A:G      | 0.066 |                                                                                  |
|              | rs6985140  | A:G      | 0.082 |                                                                                  |
|              | rs6986386  | C:T      | 0.235 |                                                                                  |
|              | rs6986755  | G:A      | 0.066 |                                                                                  |
|              | rs6989782  | C:T      | 0.293 |                                                                                  |
|              | rs6990116  | T:C      | 0.066 |                                                                                  |
|              | rs6990300  | A:G      | 0.320 |                                                                                  |
| rs6994574    | A:G        | 0.366    |       |                                                                                  |
| rs9644677    | A:G        | 0.278    |       |                                                                                  |
| rs9644704    | G:A        | 0.366    |       |                                                                                  |
| rs9644708    | T:C        | 0.209    |       |                                                                                  |
| <i>TNKS2</i> | rs10881985 | T:C      | 0.306 | TRF1-interacting ankyrin-related                                                 |

**Supp. Table S1. SNPs from 43 telomere biology gene regions**

| Gene | SNP        | Alleles* | MAF   | Gene name; aka                                               |
|------|------------|----------|-------|--------------------------------------------------------------|
|      | rs12411706 | G:A      | 0.177 | ADP-ribose polymerase 2; TANK2,<br>PARP5B                    |
|      | rs1538833  | C:T      | 0.084 |                                                              |
|      | rs1539041  | G:T      | 0.309 |                                                              |
|      | rs2066275  | A:G      | 0.306 |                                                              |
|      | rs2258946  | C:T      | 0.148 |                                                              |
|      | rs3802650  | T:C      | 0.483 |                                                              |
|      | rs6583787  | T:C      | 0.423 |                                                              |
|      | rs7072165  | T:C      | 0.094 |                                                              |
|      | rs10954778 | A:G      | 0.296 | <i>WRN</i><br>Werner syndrome, RecQ helicase-like;<br>RECQL2 |
|      | rs11574245 | T:C      | 0.096 |                                                              |
|      | rs11574304 | C:T      | 0.078 |                                                              |
|      | rs13251813 | C:T      | 0.038 |                                                              |
|      | rs13269094 | T:G      | 0.152 |                                                              |
|      | rs13278931 | G:T      | 0.466 |                                                              |
|      | rs1346044  | T:C      | 0.273 |                                                              |
|      | rs1800391  | G:A      | 0.083 |                                                              |
|      | rs1800392  | G:T      | 0.449 |                                                              |
|      | rs2015230  | A:G      | 0.347 |                                                              |
|      | rs2019726  | A:G      | 0.190 |                                                              |
|      | rs2037962  | T:C      | 0.063 |                                                              |
|      | rs2247296  | T:G      | 0.017 |                                                              |
|      | rs2553256  | A:G      | 0.366 |                                                              |
|      | rs2725344  | A:G      | 0.069 |                                                              |
|      | rs2725361  | A:G      | 0.363 |                                                              |
|      | rs2725385  | G:A      | 0.296 |                                                              |
|      | rs2737342  | A:G      | 0.266 |                                                              |
|      | rs3024239  | C:T      | 0.496 |                                                              |
|      | rs3087409  | C:A      | 0.063 |                                                              |
|      | rs4398867  | G:A      | 0.107 |                                                              |
|      | rs4733220  | G:A      | 0.422 |                                                              |
|      | rs4987034  | A:G      | 0.189 |                                                              |
|      | rs4987236  | G:A      | 0.063 |                                                              |
|      | rs6982140  | T:C      | 0.063 |                                                              |
|      | rs6994361  | T:C      | 0.365 |                                                              |
|      | rs919002   | T:C      | 0.383 |                                                              |
|      | rs132765   | G:A      | 0.185 |                                                              |
|      | rs132793   | G:A      | 0.184 |                                                              |
|      | rs17002523 | C:T      | 0.007 |                                                              |

\* major allele:minor allele

MAF = minor allele frequency

aka = also known as

† SNPs in an extended region around *TERT* and *CLPTMIL*
